# Supplementary material for: A density functional theory study of hydrogen dissociation and diffusion at the perimeter sites of Au/TiO2
Source: Royal Society of Chemistry journal article supplement (doi:10.1039/c2cp23755e), 2012-01-01
Supplement: c2cp23755e.pdf [file c2cp23755e.pdf]

## Electronic Supplementary Information

### A density functional theory study of hydrogen dissociation and diffusion at the perimeter sites of Au/TiO<sub>2</sub>

Bo Yang,<sup>a</sup> Xiao-Ming Cao,<sup>a,b</sup> Xue-Qing Gong<sup>\*a</sup> and P. Hu<sup>\*a,b</sup>

<sup>a</sup> *State Key Laboratory of Chemical Engineering, Center for Computational Chemistry and Research Institute of Industrial Catalysis, East China University of Science & Technology, Shanghai 200237, China*

<sup>b</sup> *School of Chemistry & Chemical Engineering, The Queen's University of Belfast, Belfast, BT9 5AG, U. K.*

Email: xgong@ecust.edu.cn; p.hu@qub.ac.uk

## The optimized Au-H, O-H and H-H distances in all structures

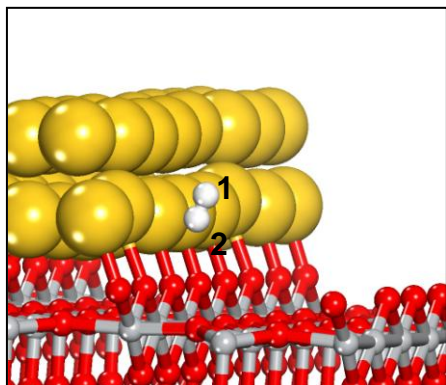

Adsorption state:

$H_1\text{-Au} : 2.81 \text{ \AA}$ ;  $H_1\text{-O} : 3.36 \text{ \AA}$ ;

$H_2\text{-Au} : 2.51 \text{ \AA}$ ;  $H_1\text{-O} : 2.63 \text{ \AA}$ ;

$H_1\text{-H}_2 : 0.76 \text{ \AA}$

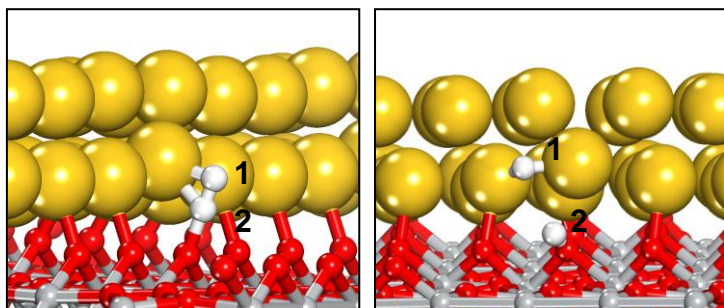

Heterolytic dissociation:

Transition state:  $H_1\text{-Au} : 1.81 \text{ \AA}$ ;  $H_2\text{-O} : 1.43 \text{ \AA}$ ;  $H_1\text{-H}_2 : 0.95 \text{ \AA}$

Final state:  $H_1\text{-Au} : 1.81 \text{ \AA}$ ,  $1.77 \text{ \AA}$ ;  $H_2\text{-O} : 0.97 \text{ \AA}$ ;  $H_1\text{-H}_2 : 2.55 \text{ \AA}$

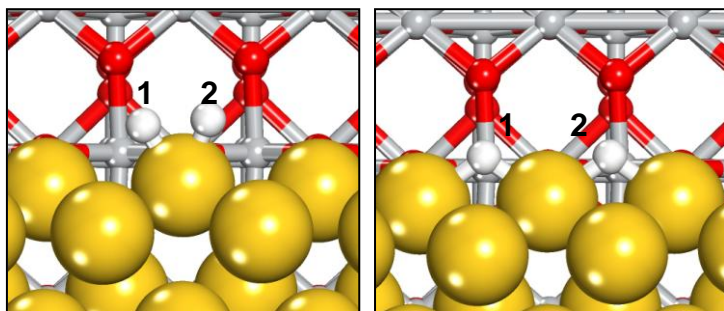

Homolytic dissociation:

Transition state:  $H_1\text{-Au}$  : 1.63 Å;  $H_2\text{-Au}$  : 1.62 Å;  $H_1\text{-H}_2$  : 1.46 Å

Final state:  $H_1\text{-Au}$  : 1.82 Å, 1.76 Å;  $H_2\text{-Au}$  : 1.82 Å, 1.76 Å;  $H_1\text{-H}_2$  : 2.86 Å

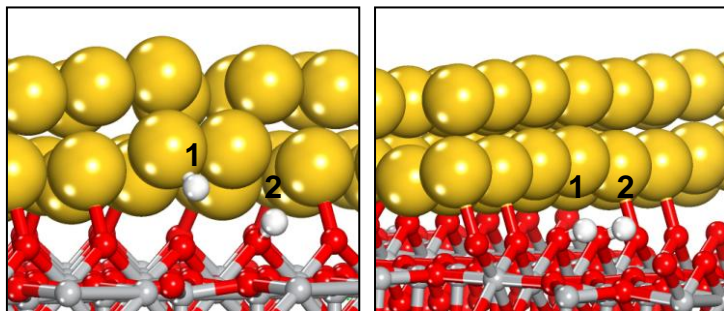

Diffusion from heterolytic dissociation:

Transition state:  $H_1\text{-Au}$  : 1.60 Å;  $H_1\text{-O}$  : 1.80 Å;  $H_2\text{-O}$  : 0.97 Å;  $H_1\text{-H}_2$  : 2.93 Å

Final state:  $H_1\text{-Au}$  : 2.77 Å;  $H_1\text{-O}$  : 0.97 Å;  $H_2\text{-O}$  : 0.97 Å;  $H_1\text{-H}_2$  : 2.98 Å

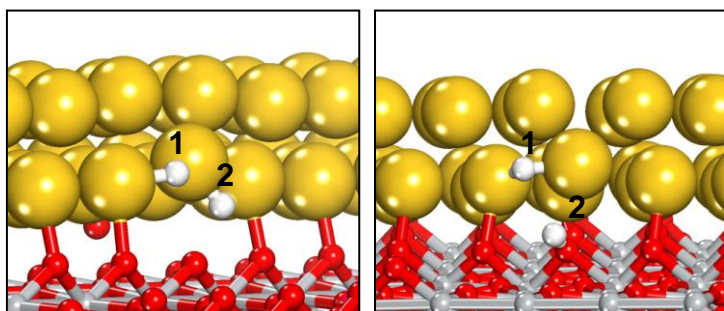

Diffusion from homolytic dissociation:

Transition state:  $H_1\text{-Au}$  : 1.81 Å, 1.75 Å;  $H_2\text{-Au}$  : 1.60 Å;  $H_2\text{-O}$  : 1.91 Å;  $H_1\text{-H}_2$  : 0.95 Å

Final state:  $H_1\text{-Au}$  : 1.81 Å, 1.77 Å;  $H_2\text{-Au}$  : 2.74 Å;  $H_2\text{-O}$  : 0.97 Å;  $H_1\text{-H}_2$  : 2.55 Å
